# Supplementary figures and images for: Factors influencing thyroid volume in Chinese children
Source: PubMed Central journal article supplement — Eur J Clin Nutr. 2013 Sep 25;67(11):1138–41. doi: 10.1038/ejcn.2013.173 (PMC3898111; doi:10.1038/ejcn.2013.173), 2013-09-25

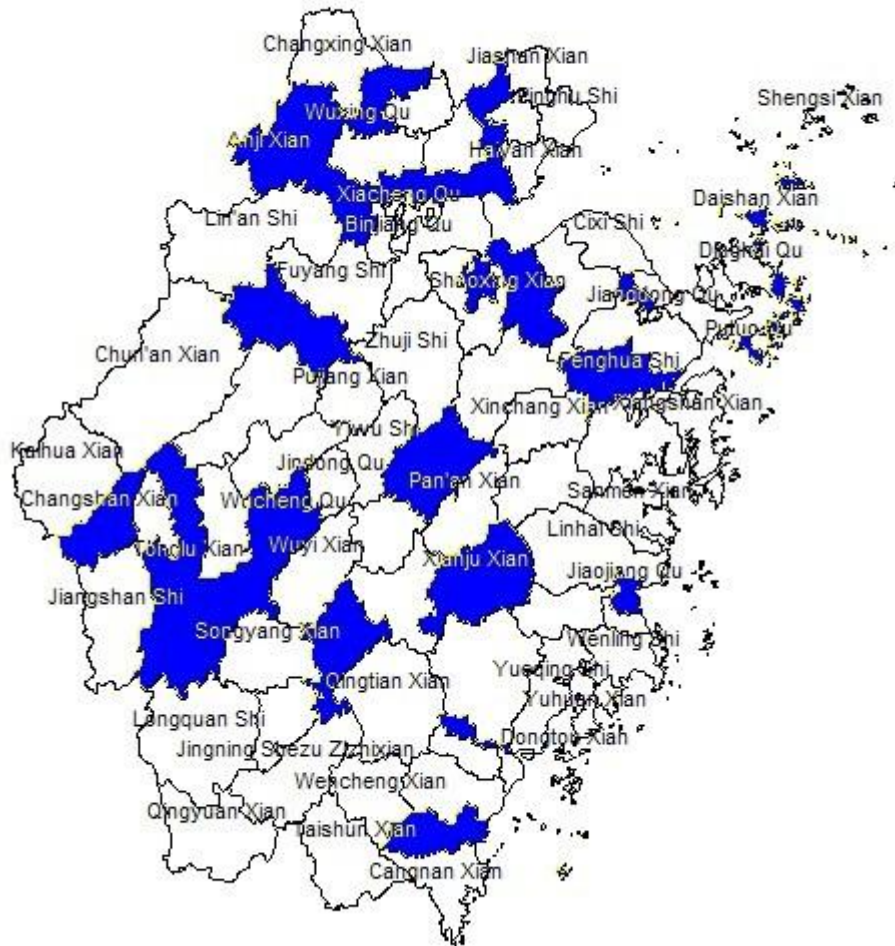

**Supplementary figure: Sampling unit of the provincial study in Zhejiang province**

Supplement: ejcn2013173x1.pdf [file ejcn2013173x1.pdf]
